# Supplementary material for: Organic electrochemical transistor arrays for real-time mapping of evoked neurotransmitter release in vivo
Source: eLife. 2020 Feb 11;9:e50345. doi: 10.7554/eLife.50345 (PMC7075691; doi:10.7554/eLife.50345)
Supplement: Figure 2—source data 1. [file elife-50345-fig2-data1.xlsx]

## Sheet: Fig. 2c
Time	0	1	2	3	4	5	6	7	8	9	10	11	12	13	14	15	16	17	18	19	20	21	22	23	24	25	26	27	28	29	30	31	32	33	34	35	36	37	38	39	40	41	42	43	44	45	46	47	48
IDS	7.39116e-05	7.39135e-05	7.39149e-05	7.3916e-05	7.39167e-05	7.39172e-05	7.39173e-05	7.39173e-05	7.3917e-05	7.39165e-05	7.39159e-05	7.39152e-05	7.39143e-05	7.39134e-05	7.39124e-05	7.39115e-05	7.39118e-05	7.39115e-05	7.39092e-05	7.39077e-05	7.3908e-05	7.39061e-05	7.39072e-05	7.39076e-05	7.39087e-05	7.39091e-05	7.39094e-05	7.39087e-05	7.39094e-05	7.39081e-05	7.39071e-05	7.39057e-05	7.39051e-05	7.39057e-05	7.39036e-05	7.39016e-05	7.39015e-05	7.39e-05	7.3897e-05	7.38952e-05	7.38938e-05	7.38905e-05	7.38881e-05	7.38849e-05	7.38826e-05	7.38803e-05	7.388e-05	7.38782e-05	7.38761e-05
[truncated: 852 more columns]

## Sheet: Fig. 2d
Conecntration	3e-08	1e-07	3e-07	1e-06	3e-06	1e-05	3e-05	0.0001
Average	6.73721e-05	0.000173076	0.000257414	0.000536148	0.00134671	0.00414171	0.0116989	0.0216639
S.E.M.	6.45065e-06	5.81815e-05	6.32015e-05	6.5187e-05	0.00015	0.000265	0.00101	0.00256
Fitted curve (concentration)	1e-08	1.10975e-08	1.23154e-08	1.36669e-08	1.51668e-08	1.68313e-08	1.86784e-08	2.07283e-08	2.30032e-08	2.55277e-08	2.83292e-08	3.14382e-08	3.48884e-08	3.87173e-08	4.29663e-08	4.76817e-08	5.29146e-08	5.87217e-08	6.51661e-08	7.23178e-08	8.02544e-08	8.9062e-08	9.88362e-08	1.09683e-07	1.2172e-07	1.35078e-07	1.49903e-07	1.66354e-07	1.84611e-07	2.04871e-07	2.27354e-07	2.52306e-07	2.79995e-07	3.10723e-07	3.44824e-07	3.82667e-07	4.24663e-07	4.71268e-07	5.22987e-07	5.80383e-07	6.44077e-07	7.14762e-07	7.93204e-07	8.80254e-07	9.76859e-07	1.08406e-06	1.20304e-06	1.33506e-06	1.48158e-06
Fitted curve (delta Vg-eff)	2.33272e-05	2.52023e-05	2.72281e-05	2.94167e-05	3.17813e-05	3.43359e-05	3.70959e-05	4.00777e-05	4.32992e-05	4.67796e-05	5.05398e-05	5.46023e-05	5.89913e-05	6.37331e-05	6.8856e-05	7.43907e-05	8.03704e-05	8.68306e-05	9.38102e-05	0.000101351	0.000109497	0.000118299	0.000127808	0.000138081	0.000149181	0.000161172	0.000174127	0.000188124	0.000203245	0.000219582	0.000237233	0.000256302	0.000276904	0.000299161	0.000323208	0.000349188	0.000377257	0.000407581	0.000440343	0.000475738	0.000513979	0.000555293	0.000599928	0.000648151	0.00070025	0.000756537	0.000817348	0.000883048	0.000954028
[truncated: 51 more columns]
