# Supplementary material for: Organic electrochemical transistor arrays for real-time mapping of evoked neurotransmitter release in vivo
Source: eLife. 2020 Feb 11;9:e50345. doi: 10.7554/eLife.50345 (PMC7075691; doi:10.7554/eLife.50345)
Supplement: Figure 3—source data 1. [file elife-50345-fig3-data1.xlsx]

## Sheet: Fig. 3c
VGS-brain	0	0.02	0.04	0.06	0.08	0.1	0.12	0.14	0.16	0.18	0.2	0.22	0.24	0.26	0.28	0.3	0.32	0.34	0.36	0.38	0.4	0.42	0.44	0.46	0.48	0.5	0.52	0.54	0.56	0.58	0.6	0.62	0.64	0.66	0.68	0.7
IDS-brain	1	0.989158	0.977162	0.963843	0.949109	0.932714	0.914332	0.89375	0.870811	0.845397	0.817025	0.78587	0.751688	0.714366	0.674047	0.631129	0.585834	0.538723	0.49022	0.441366	0.39275	0.345231	0.299404	0.256291	0.216004	0.179522	0.146719	0.117983	0.0933773	0.0726262	0.0556228	0.0416153	0.0306913	0.0221551	0.0157625	0.010993
gm-brain	3.6533e-05	3.84778e-05	4.26513e-05	4.72645e-05	5.24483e-05	5.8593e-05	6.56473e-05	7.3326e-05	8.14655e-05	9.06203e-05	0.000100293	0.000110082	0.000120472	0.00013081	0.000140239	0.000148623	0.000155688	0.000161093	0.00016403	0.00016422	0.000161971	0.000157272	0.000149848	0.000140514	0.000129342	0.000116734	0.000103683	8.98712e-05	7.64184e-05	6.36098e-05	5.22479e-05	4.20053e-05	3.2787e-05	2.51525e-05	1.88063e-05	1.38223e-05
VGS-ACSF	0	0.02059	0.04118	0.06176	0.08235	0.10294	0.12353	0.14412	0.16471	0.18529	0.20588	0.22647	0.24706	0.26765	0.28824	0.30882	0.32941	0.35	0.37059	0.39118	0.41176	0.43235	0.45294	0.47353	0.49412	0.51471	0.53529	0.55588	0.57647	0.59706	0.61765	0.63824	0.65882	0.67941	0.7
IDS-ACSF	1	0.98892	0.97606	0.96164	0.94569	0.92827	0.90907	0.88798	0.86468	0.83932	0.81168	0.78152	0.74902	0.71375	0.67567	0.63563	0.59307	0.54958	0.50374	0.45668	0.40923	0.36215	0.31567	0.27048	0.22745	0.19037	0.15473	0.12899	0.09817	0.07153	0.04938	0.03172	0.01805	0.00773	0
gm-ACSF	4.88755e-05	5.2809e-05	6.01948e-05	6.7007e-05	7.36238e-05	8.07945e-05	8.88871e-05	9.79209e-05	0.000107337	0.000116938	0.000127537	0.000138249	0.000149508	0.000161807	0.000172343	0.000182249	0.000189847	0.000197073	0.000204964	0.000208502	0.000208544	0.000206416	0.000202248	0.000194629	0.000176732	0.000160441	0.000135419	0.00012478	0.000126754	0.00010765	8.78492e-05	6.91168e-05	5.29091e-05	3.98155e-05	3.41232e-05

## Sheet: Fig. 3d
control	1 pulse	10 pulses	30 pulses	50 pulses	100 pulses
22.8432	12.2669	19.7054	123.228	64.8856	334.532
15.6785	15.0604	19.806	160.148	201.991	320.77
0	46.489	42.6822	119.326	364.861	228.99
16.4345	35.9548	8.81754	175.855	311.274	356.502
0.42389	22.2539	14.8362	170.816	202.578	266.211
0.01464	43.6322	37.825	173.908	292.871	167.636
9.03063	30.7257	10.0056	228.321	344.527	164.933
34.787	9.69141	30.6063	106.384	175.447	162.209
0	15.9767	40.9207	155.397	209.605	175.301
0	34.5835	11.5603	128.016	310.615	200.577
0	12.1703	16.3302	125.031	235.553	263.486
0	53.3674	18.5559	96.8659	189.014	334.784
0	73.3447	4.3615	86.6974	269.746	263.142
26.0951	45.9114	37.0228	98.1565	104.838	202.758
3.70226	59.7654	6.97353	139.016	202.208	254.718
59.4643	36.6059	45.8413	100.418	141.591	189.384
0	55.4678	17.1633	111.534	183.546	163.979
0	41.7774	30.0064	117.037	229.327	247.075
0	75.8423	27.0449	64.8856	204.353	280.17
0	24.0131	51.9181	100.456	268.741	293.772
7.72813	0	28.0551	76.885	215.282	317.738
0	74.1957	39.7191	121.453	224.03	176.065
0.69265	70.8859	49.7083	123.2	300.02	179.293
15.7206	98.4838	2.64524	167.959	294.962	285.471
10.9946	56.7942	49.3143	53.6813	225.351	268.126
0	87.8532	53.4004	149.512	286.54	245.174
0	0	36.9687	90.5891	258.5	232.597
19.368	63.592	18.9234	92.3995	253.843	283.247
20.3821	78.4284	38.0235	26.7566	139.185	469.108
0	126.407	27.5327	61.8995	295.084	553.054
20.3233	44.0665	4.36116	92.9113	287.316	483.659
0	13.3529	49.4502	72.2817	278.045	501.818
0	47.9526	25.5927	98.3028	294.857	474.502
0	18.6576	181.83	45.1029	226.721	478.647
4.52964	4.56503	145.094	121.142	265.536	406.69
10.1519	72.2799	147.586	128.292	238.127	515.016
0	57.6555	154.26	117.212	253.982	466.563
0	32.5592	142.811	83.909	265.645	424.344
13.3349	27.3456	154.072		334.532	459.589
24.1586	42.8422	135.696		347.609	552.228
10.1736	57.1318	141.42		224.12	468.22
58.927	82.1236	140.826		250.986	351.898
0	57.6052	137.22		309.555	508.294
30.5543	23.3014	132.506		322.268	504.1
41.923	66.6245	129.118		290.294	410.683
0	37.0241	155.842		282.863	433.935
27.7713	0	113.378		316.118	477.178
30.6476	24.9598	114.551		323.986	515.247
30.5642	0			292.01	360.208
0.89912	0.95345			223.474	323.293
0	0			292.885	447.415
0	0			290.722	373.484
58.9656	13.2424			377.9	339.609
0.12378	0.35018			293.272	481.151
21.9715	0.83003			259.387	513.593
8.08301	0.41243			295.292	426.852
0	30.5637			346.806	430.953
6.9886	25.9406			270.353	343.474
0	2.08357			339.894	433.19
1.80294	4.5424			339.53	442.345
17.0581	0			265.549	524.726
0.51374	7.6237			368.108	406.436
18.7951	0			366.905	482.256
6.54185	10.5648			283.2	425.056
5.05714	20.9978			274.515	412.247
48.2128	10.9019			222.107	423.618
7.67601	0			279.351	439.202
0	6.47223			253.687	370.507
8.83132	12.5914			337.5
15.6296	11.3599			283.728
0	0			244.165
15.1051	13.9554			312.759
0	12.8971			198.214
2.55185	0			268.823
0	23.8671			301.081
0	4.95859			300.795
0	26.7325
1.74764	0
0.6098	5.84158
5.28048
27.3746
54.5469
5.98715
0
19.6389
0
0

## Sheet: Fig. 3e
Pulses	1	10	30	50	100
Average	36.1378	88.114	112.859	267.467	356.052
S.E.M.	11.9453	35.7835	13.9164	16.2147	52.0663
Trial1	25.8036	143.756	133.035	227.016	244.895
Tiral2	46.6047	155.954	92.5969	255.545	293.405
Trial2	82.3132	21.7188	85.457	295.262	466.891
Tiral3	49.0841	31.0274	140.345	292.043	419.019
Trial3	4.38115
Tiral4	8.6403
