# Supplementary material for: Organic electrochemical transistor arrays for real-time mapping of evoked neurotransmitter release in vivo
Source: eLife. 2020 Feb 11;9:e50345. doi: 10.7554/eLife.50345 (PMC7075691; doi:10.7554/eLife.50345)
Supplement: Figure 4—source data 1. [file elife-50345-fig4-data1.xlsx]

## Sheet: Fig. 4c
Time	0	0.05	0.1	0.15	0.2	0.25	0.3	0.35	0.4	0.45	0.5	0.55	0.6	0.65	0.7	0.75	0.8	0.85	0.9	0.95	1	1.05	1.1	1.15	1.2	1.25	1.3	1.35	1.4	1.45	1.5	1.55	1.6	1.65	1.7	1.75	1.8	1.85	1.9	1.95	2	2.05	2.1	2.15	2.2	2.25	2.3	2.35	2.4
Avg	2.6188e-05	2.61867e-05	2.61873e-05	2.6187e-05	2.61869e-05	2.61869e-05	2.61859e-05	2.61866e-05	2.61876e-05	2.61864e-05	2.61857e-05	2.61862e-05	2.61871e-05	2.61879e-05	2.61876e-05	2.6187e-05	2.61874e-05	2.61876e-05	2.61877e-05	2.61877e-05	2.61858e-05	2.61864e-05	2.61861e-05	2.61864e-05	2.61859e-05	2.61862e-05	2.61859e-05	2.61846e-05	2.61853e-05	2.61869e-05	2.61866e-05	2.61854e-05	2.61862e-05	2.61866e-05	2.61846e-05	2.6186e-05	2.61858e-05	2.61857e-05	2.61863e-05	2.61851e-05	2.61838e-05	2.61849e-05	2.61848e-05	2.61839e-05	2.6185e-05	2.61848e-05	2.61851e-05	2.61868e-05	2.61861e-05
Avg+S.E.M	2.6195e-05	2.61937e-05	2.61942e-05	2.61941e-05	2.61939e-05	2.61939e-05	2.6193e-05	2.61936e-05	2.61945e-05	2.61933e-05	2.61927e-05	2.61934e-05	2.61938e-05	2.61944e-05	2.61941e-05	2.61934e-05	2.61941e-05	2.61943e-05	2.61942e-05	2.6194e-05	2.61922e-05	2.61929e-05	2.61927e-05	2.61928e-05	2.61921e-05	2.61923e-05	2.61921e-05	2.61911e-05	2.61913e-05	2.61927e-05	2.61923e-05	2.61914e-05	2.61921e-05	2.61928e-05	2.61905e-05	2.61921e-05	2.6192e-05	2.61919e-05	2.61922e-05	2.61911e-05	2.61893e-05	2.61907e-05	2.61905e-05	2.61896e-05	2.61906e-05	2.61904e-05	2.61907e-05	2.61924e-05	2.61914e-05
Avg-S.E.M	2.6181e-05	2.61796e-05	2.61804e-05	2.61799e-05	2.618e-05	2.61799e-05	2.61788e-05	2.61796e-05	2.61807e-05	2.61795e-05	2.61786e-05	2.6179e-05	2.61804e-05	2.61814e-05	2.61811e-05	2.61807e-05	2.61807e-05	2.61809e-05	2.61812e-05	2.61813e-05	2.61794e-05	2.61799e-05	2.61795e-05	2.61799e-05	2.61797e-05	2.61801e-05	2.61798e-05	2.61781e-05	2.61793e-05	2.61811e-05	2.61809e-05	2.61794e-05	2.61803e-05	2.61804e-05	2.61786e-05	2.61799e-05	2.61797e-05	2.61796e-05	2.61803e-05	2.61791e-05	2.61783e-05	2.6179e-05	2.61791e-05	2.61782e-05	2.61794e-05	2.61791e-05	2.61794e-05	2.61813e-05	2.61808e-05
Trial(gray) 1	2.61669e-05	2.61631e-05	2.61649e-05	2.61572e-05	2.61622e-05	2.61715e-05	2.61649e-05	2.61664e-05	2.61635e-05	2.61715e-05	2.61743e-05	2.61701e-05	2.61752e-05	2.61781e-05	2.6175e-05	2.61767e-05	2.61735e-05	2.61758e-05	2.61746e-05	2.61786e-05	2.61774e-05	2.61755e-05	2.61683e-05	2.61737e-05	2.61677e-05	2.61794e-05	2.61811e-05	2.61771e-05	2.618e-05	2.61761e-05	2.61791e-05	2.61765e-05	2.61852e-05	2.61885e-05	2.61881e-05	2.6188e-05	2.61832e-05	2.61882e-05	2.61817e-05	2.61854e-05	2.61874e-05	2.61867e-05	2.61841e-05	2.61849e-05	2.6186e-05	2.61846e-05	2.61862e-05	2.61958e-05	2.61973e-05
Trial(gray) 2	2.61709e-05	2.61634e-05	2.61643e-05	2.61668e-05	2.61655e-05	2.61605e-05	2.61699e-05	2.61686e-05	2.61672e-05	2.61595e-05	2.61559e-05	2.61592e-05	2.61696e-05	2.61646e-05	2.61671e-05	2.61735e-05	2.61706e-05	2.61713e-05	2.61667e-05	2.61659e-05	2.6163e-05	2.61671e-05	2.61667e-05	2.61691e-05	2.61704e-05	2.61654e-05	2.6162e-05	2.616e-05	2.61686e-05	2.61707e-05	2.6169e-05	2.61697e-05	2.61653e-05	2.61604e-05	2.616e-05	2.61532e-05	2.61613e-05	2.61609e-05	2.6155e-05	2.61533e-05	2.6155e-05	2.61563e-05	2.61592e-05	2.61585e-05	2.61598e-05	2.61535e-05	2.61584e-05	2.61628e-05	2.61783e-05
Trial(gray) 3	2.62703e-05	2.62733e-05	2.6271e-05	2.62725e-05	2.62738e-05	2.62723e-05	2.62667e-05	2.62645e-05	2.62675e-05	2.62637e-05	2.62612e-05	2.62671e-05	2.62623e-05	2.62674e-05	2.62718e-05	2.6261e-05	2.62629e-05	2.62674e-05	2.62656e-05	2.62683e-05	2.62637e-05	2.62647e-05	2.62683e-05	2.62608e-05	2.62563e-05	2.62661e-05	2.62582e-05	2.62576e-05	2.62552e-05	2.62564e-05	2.62501e-05	2.62611e-05	2.62603e-05	2.6267e-05	2.62602e-05	2.62675e-05	2.6258e-05	2.62658e-05	2.62695e-05	2.62637e-05	2.62492e-05	2.62684e-05	2.62641e-05	2.62574e-05	2.62542e-05	2.62603e-05	2.62609e-05	2.62584e-05	2.6247e-05
Trial(gray) 4	2.62455e-05	2.62382e-05	2.62422e-05	2.62398e-05	2.62365e-05	2.62397e-05	2.62395e-05	2.62422e-05	2.6247e-05	2.62523e-05	2.62468e-05	2.62408e-05	2.62438e-05	2.62388e-05	2.62419e-05	2.62329e-05	2.62346e-05	2.62345e-05	2.62345e-05	2.6229e-05	2.62345e-05	2.6238e-05	2.62376e-05	2.6237e-05	2.62339e-05	2.62313e-05	2.62399e-05	2.62351e-05	2.62326e-05	2.62283e-05	2.62295e-05	2.6226e-05	2.62221e-05	2.62236e-05	2.62287e-05	2.6231e-05	2.6232e-05	2.62255e-05	2.62243e-05	2.62239e-05	2.62172e-05	2.62137e-05	2.62175e-05	2.6216e-05	2.62181e-05	2.62133e-05	2.62145e-05	2.62145e-05	2.6224e-05
Trial(gray) 5	2.61949e-05	2.62024e-05	2.62018e-05	2.62057e-05	2.62008e-05	2.62021e-05	2.61968e-05	2.62e-05	2.62022e-05	2.62026e-05	2.62005e-05	2.61982e-05	2.62026e-05	2.61996e-05	2.61985e-05	2.62065e-05	2.61973e-05	2.61995e-05	2.61999e-05	2.61996e-05	2.6201e-05	2.62068e-05	2.62025e-05	2.62037e-05	2.61952e-05	2.62018e-05	2.61893e-05	2.61921e-05	2.61975e-05	2.62034e-05	2.61957e-05	2.62025e-05	2.62077e-05	2.62116e-05	2.62031e-05	2.62077e-05	2.61985e-05	2.62124e-05	2.62084e-05	2.61946e-05	2.61949e-05	2.6201e-05	2.6198e-05	2.61945e-05	2.61935e-05	2.61993e-05	2.61872e-05	2.61924e-05	2.61913e-05
Trial(gray) 6	2.61848e-05	2.61869e-05	2.61857e-05	2.61944e-05	2.61879e-05	2.61869e-05	2.61854e-05	2.61832e-05	2.61828e-05	2.61877e-05	2.61858e-05	2.61878e-05	2.61937e-05	2.61851e-05	2.61806e-05	2.61786e-05	2.61815e-05	2.6183e-05	2.6188e-05	2.61877e-05	2.61788e-05	2.61778e-05	2.61748e-05	2.61785e-05	2.61794e-05	2.61829e-05	2.6183e-05	2.61845e-05	2.61814e-05	2.61841e-05	2.61808e-05	2.61848e-05	2.61865e-05	2.61847e-05	2.61814e-05	2.61843e-05	2.61893e-05	2.61875e-05	2.61828e-05	2.61745e-05	2.61788e-05	2.6182e-05	2.61807e-05	2.61824e-05	2.61838e-05	2.61778e-05	2.61823e-05	2.61914e-05	2.61901e-05
Trial(gray) 7	2.62227e-05	2.62241e-05	2.62225e-05	2.62181e-05	2.62149e-05	2.62173e-05	2.62124e-05	2.62211e-05	2.62182e-05	2.62144e-05	2.62093e-05	2.62143e-05	2.62193e-05	2.62177e-05	2.62205e-05	2.62257e-05	2.62233e-05	2.62204e-05	2.62131e-05	2.62226e-05	2.62172e-05	2.62165e-05	2.62157e-05	2.62161e-05	2.62097e-05	2.62129e-05	2.62093e-05	2.62224e-05	2.62133e-05	2.621e-05	2.62121e-05	2.62098e-05	2.62133e-05	2.62117e-05	2.62101e-05	2.62154e-05	2.62143e-05	2.62163e-05	2.62167e-05	2.62146e-05	2.6219e-05	2.62173e-05	2.62196e-05	2.6215e-05	2.6218e-05	2.62191e-05	2.62146e-05	2.62148e-05	2.62073e-05
Trial(gray) 8	2.61871e-05	2.6184e-05	2.61839e-05	2.61877e-05	2.6186e-05	2.61829e-05	2.61908e-05	2.61889e-05	2.6191e-05	2.61893e-05	2.61887e-05	2.61907e-05	2.61895e-05	2.61999e-05	2.61861e-05	2.61923e-05	2.61873e-05	2.61854e-05	2.61879e-05	2.61808e-05	2.61895e-05	2.61853e-05	2.61824e-05	2.61849e-05	2.61879e-05	2.61906e-05	2.61845e-05	2.61838e-05	2.61877e-05	2.61904e-05	2.61896e-05	2.61836e-05	2.61783e-05	2.61893e-05	2.61795e-05	2.61837e-05	2.61862e-05	2.61879e-05	2.6176e-05	2.61791e-05	2.61812e-05	2.61845e-05	2.61874e-05	2.61887e-05	2.61852e-05	2.61916e-05	2.61931e-05	2.62056e-05	2.61983e-05
Trial(gray) 9	2.61944e-05	2.61927e-05	2.61973e-05	2.61981e-05	2.62006e-05	2.62063e-05	2.62034e-05	2.62005e-05	2.62021e-05	2.6207e-05	2.62003e-05	2.62015e-05	2.61997e-05	2.62035e-05	2.61976e-05	2.61959e-05	2.62036e-05	2.61892e-05	2.61897e-05	2.61912e-05	2.61908e-05	2.61976e-05	2.61895e-05	2.61985e-05	2.6197e-05	2.61944e-05	2.61972e-05	2.61973e-05	2.61927e-05	2.61921e-05	2.6188e-05	2.61976e-05	2.61949e-05	2.6193e-05	2.61934e-05	2.61891e-05	2.61883e-05	2.61877e-05	2.6188e-05	2.61818e-05	2.61865e-05	2.61873e-05	2.61881e-05	2.61907e-05	2.61875e-05	2.61908e-05	2.61961e-05	2.61947e-05	2.619e-05
Trial(gray) 10	2.61686e-05	2.61722e-05	2.6174e-05	2.61684e-05	2.61714e-05	2.61779e-05	2.61734e-05	2.6168e-05	2.61627e-05	2.61684e-05	2.61773e-05	2.61721e-05	2.61754e-05	2.61761e-05	2.61689e-05	2.61771e-05	2.61805e-05	2.61783e-05	2.61843e-05	2.61762e-05	2.61689e-05	2.61713e-05	2.61654e-05	2.61751e-05	2.61767e-05	2.61719e-05	2.61718e-05	2.61663e-05	2.61684e-05	2.61724e-05	2.617e-05	2.61686e-05	2.61653e-05	2.61557e-05	2.6159e-05	2.61682e-05	2.61682e-05	2.61656e-05	2.61736e-05	2.61784e-05	2.6164e-05	2.61626e-05	2.61636e-05	2.61604e-05	2.61599e-05	2.61614e-05	2.61703e-05	2.61706e-05	2.6167e-05
Trial(gray) 11	2.62184e-05	2.62171e-05	2.62073e-05	2.62057e-05	2.62064e-05	2.62065e-05	2.62089e-05	2.62119e-05	2.62159e-05	2.62091e-05	2.6214e-05	2.62087e-05	2.62092e-05	2.62156e-05	2.62135e-05	2.62071e-05	2.62109e-05	2.62102e-05	2.62141e-05	2.62139e-05	2.62108e-05	2.62178e-05	2.62186e-05	2.62168e-05	2.62177e-05	2.6211e-05	2.62149e-05	2.62253e-05	2.62209e-05	2.62179e-05	2.62139e-05	2.62116e-05	2.62087e-05	2.62062e-05	2.61996e-05	2.62122e-05	2.6214e-05	2.62173e-05	2.62187e-05	2.62243e-05	2.62116e-05	2.6206e-05	2.62118e-05	2.62035e-05	2.62155e-05	2.62036e-05	2.61999e-05	2.62009e-05	2.62057e-05
Trial(gray) 12	2.62165e-05	2.6219e-05	2.62237e-05	2.62212e-05	2.62241e-05	2.62261e-05	2.62254e-05	2.62252e-05	2.62245e-05	2.62263e-05	2.62269e-05	2.62305e-05	2.62273e-05	2.62211e-05	2.62174e-05	2.6217e-05	2.62214e-05	2.62213e-05	2.62227e-05	2.62186e-05	2.62165e-05	2.62058e-05	2.62136e-05	2.62128e-05	2.62103e-05	2.62107e-05	2.62074e-05	2.62116e-05	2.6202e-05	2.62098e-05	2.62068e-05	2.6206e-05	2.61993e-05	2.62061e-05	2.62016e-05	2.62041e-05	2.6202e-05	2.6197e-05	2.62017e-05	2.62078e-05	2.61996e-05	2.62059e-05	2.62024e-05	2.62024e-05	2.62044e-05	2.61977e-05	2.6198e-05	2.6199e-05	2.62005e-05
Trial(gray) 13	2.62012e-05	2.61932e-05	2.61997e-05	2.6208e-05	2.62164e-05	2.62117e-05	2.62068e-05	2.62059e-05	2.61984e-05	2.6206e-05	2.62042e-05	2.62089e-05	2.62016e-05	2.61994e-05	2.61999e-05	2.62011e-05	2.62112e-05	2.6205e-05	2.62074e-05	2.62046e-05	2.62043e-05	2.62061e-05	2.62079e-05	2.62028e-05	2.61947e-05	2.61975e-05	2.62002e-05	2.61997e-05	2.61983e-05	2.61955e-05	2.62043e-05	2.62005e-05	2.62083e-05	2.62042e-05	2.62074e-05	2.6208e-05	2.62083e-05	2.6202e-05	2.62017e-05	2.62007e-05	2.6195e-05	2.61865e-05	2.61925e-05	2.61911e-05	2.61951e-05	2.61921e-05	2.61858e-05	2.61886e-05	2.61919e-05
Trial(gray) 14	2.62094e-05	2.62064e-05	2.62107e-05	2.62077e-05	2.6213e-05	2.62108e-05	2.62084e-05	2.62053e-05	2.62069e-05	2.62e-05	2.62147e-05	2.62125e-05	2.62042e-05	2.62052e-05	2.62095e-05	2.62089e-05	2.6209e-05	2.62187e-05	2.62118e-05	2.62098e-05	2.62064e-05	2.62037e-05	2.62032e-05	2.61997e-05	2.62008e-05	2.6203e-05	2.6197e-05	2.62e-05	2.61966e-05	2.61991e-05	2.62095e-05	2.62055e-05	2.62088e-05	2.62098e-05	2.62117e-05	2.61999e-05	2.62034e-05	2.61997e-05	2.61972e-05	2.61961e-05	2.61914e-05	2.61919e-05	2.61906e-05	2.61923e-05	2.61951e-05	2.61997e-05	2.62018e-05	2.61959e-05	2.61972e-05
Trial(gray) 15	2.62175e-05	2.62136e-05	2.62136e-05	2.62159e-05	2.62195e-05	2.62137e-05	2.62115e-05	2.62184e-05	2.62168e-05	2.62156e-05	2.62142e-05	2.62129e-05	2.62125e-05	2.62141e-05	2.62112e-05	2.6209e-05	2.62145e-05	2.62138e-05	2.62141e-05	2.62064e-05	2.62142e-05	2.62065e-05	2.6208e-05	2.62075e-05	2.62039e-05	2.62034e-05	2.62024e-05	2.62037e-05	2.62141e-05	2.62126e-05	2.62146e-05	2.62101e-05	2.62086e-05	2.62107e-05	2.62072e-05	2.62083e-05	2.62076e-05	2.62074e-05	2.62097e-05	2.62092e-05	2.62141e-05	2.62098e-05	2.62035e-05	2.61995e-05	2.62067e-05	2.62074e-05	2.62035e-05	2.62109e-05	2.62066e-05
Trial(gray) 16	2.61981e-05	2.61933e-05	2.61992e-05	2.62013e-05	2.62e-05	2.61962e-05	2.61973e-05	2.62018e-05	2.61929e-05	2.61957e-05	2.61919e-05	2.61926e-05	2.61801e-05	2.61871e-05	2.61815e-05	2.6187e-05	2.61897e-05	2.6193e-05	2.62004e-05	2.62018e-05	2.61914e-05	2.61971e-05	2.61993e-05	2.61956e-05	2.62023e-05	2.61989e-05	2.61966e-05	2.61986e-05	2.61865e-05	2.61865e-05	2.6188e-05	2.61868e-05	2.61926e-05	2.61995e-05	2.61895e-05	2.61926e-05	2.61904e-05	2.62003e-05	2.61815e-05	2.61828e-05	2.61869e-05	2.61908e-05	2.61889e-05	2.6187e-05	2.61896e-05	2.61957e-05	2.61869e-05	2.61989e-05	2.61958e-05
Trial(gray) 17	2.61715e-05	2.61615e-05	2.61666e-05	2.61645e-05	2.61658e-05	2.61705e-05	2.61676e-05	2.61753e-05	2.61735e-05	2.61701e-05	2.61648e-05	2.61672e-05	2.61746e-05	2.61675e-05	2.61601e-05	2.61658e-05	2.61625e-05	2.61636e-05	2.61708e-05	2.61683e-05	2.61623e-05	2.61649e-05	2.61552e-05	2.61645e-05	2.61637e-05	2.61554e-05	2.61564e-05	2.61584e-05	2.61557e-05	2.61618e-05	2.61626e-05	2.61614e-05	2.61557e-05	2.61542e-05	2.61571e-05	2.61591e-05	2.61534e-05	2.61515e-05	2.61615e-05	2.61616e-05	2.61586e-05	2.61706e-05	2.61605e-05	2.61628e-05	2.61652e-05	2.61678e-05	2.61692e-05	2.61712e-05	2.61688e-05
Trial(gray) 18	2.61848e-05	2.61862e-05	2.61817e-05	2.61722e-05	2.61681e-05	2.61743e-05	2.61698e-05	2.61769e-05	2.61717e-05	2.61848e-05	2.61818e-05	2.618e-05	2.61761e-05	2.61818e-05	2.6177e-05	2.61765e-05	2.61746e-05	2.61816e-05	2.61798e-05	2.61753e-05	2.61738e-05	2.61822e-05	2.61752e-05	2.61832e-05	2.61779e-05	2.61902e-05	2.61776e-05	2.618e-05	2.61779e-05	2.61861e-05	2.6184e-05	2.61809e-05	2.6179e-05	2.61752e-05	2.61814e-05	2.61765e-05	2.61861e-05	2.61818e-05	2.61795e-05	2.61802e-05	2.61803e-05	2.61818e-05	2.6175e-05	2.61809e-05	2.61748e-05	2.61811e-05	2.61807e-05	2.61784e-05	2.61859e-05
Trial(gray) 19	2.61327e-05	2.61307e-05	2.61361e-05	2.61338e-05	2.61328e-05	2.61291e-05	2.61266e-05	2.61274e-05	2.61308e-05	2.6132e-05	2.61268e-05	2.61272e-05	2.61385e-05	2.61308e-05	2.61284e-05	2.6132e-05	2.61266e-05	2.61313e-05	2.61363e-05	2.6137e-05	2.61338e-05	2.61282e-05	2.61291e-05	2.61306e-05	2.61327e-05	2.61369e-05	2.6134e-05	2.61291e-05	2.61301e-05	2.61398e-05	2.61419e-05	2.6134e-05	2.61314e-05	2.6141e-05	2.61416e-05	2.61458e-05	2.61469e-05	2.61484e-05	2.61486e-05	2.61542e-05	2.61495e-05	2.6144e-05	2.61473e-05	2.61407e-05	2.61402e-05	2.61458e-05	2.6147e-05	2.61502e-05	2.61494e-05
Trial(gray) 20	2.61336e-05	2.61325e-05	2.6134e-05	2.6134e-05	2.61401e-05	2.6137e-05	2.61347e-05	2.61362e-05	2.61381e-05	2.61345e-05	2.61346e-05	2.61286e-05	2.61347e-05	2.61342e-05	2.61397e-05	2.61381e-05	2.61306e-05	2.61348e-05	2.61341e-05	2.61381e-05	2.61362e-05	2.61394e-05	2.61367e-05	2.61377e-05	2.61413e-05	2.61445e-05	2.61402e-05	2.61373e-05	2.61382e-05	2.61361e-05	2.61375e-05	2.61324e-05	2.61454e-05	2.61373e-05	2.61415e-05	2.61386e-05	2.6129e-05	2.61249e-05	2.61306e-05	2.61271e-05	2.61292e-05	2.61304e-05	2.61347e-05	2.6132e-05	2.6137e-05	2.61363e-05	2.61401e-05	2.61414e-05	2.61401e-05
Trial(gray) 21	2.61514e-05	2.615e-05	2.61464e-05	2.61459e-05	2.61461e-05	2.61364e-05	2.61352e-05	2.61317e-05	2.61446e-05	2.61446e-05	2.61369e-05	2.6141e-05	2.61421e-05	2.61444e-05	2.61454e-05	2.61371e-05	2.61388e-05	2.61444e-05	2.61474e-05	2.61446e-05	2.61476e-05	2.61418e-05	2.61417e-05	2.61486e-05	2.61513e-05	2.61545e-05	2.61519e-05	2.61536e-05	2.61555e-05	2.61539e-05	2.61572e-05	2.61493e-05	2.61489e-05	2.61485e-05	2.61493e-05	2.61561e-05	2.61506e-05	2.61476e-05	2.61571e-05	2.61462e-05	2.61536e-05	2.61545e-05	2.61542e-05	2.6151e-05	2.61523e-05	2.61555e-05	2.61629e-05	2.6164e-05	2.61577e-05
Trial(gray) 22	2.61409e-05	2.61502e-05	2.6142e-05	2.61464e-05	2.61445e-05	2.61469e-05	2.61414e-05	2.61513e-05	2.61477e-05	2.61487e-05	2.61452e-05	2.61503e-05	2.61499e-05	2.61564e-05	2.61586e-05	2.61599e-05	2.61484e-05	2.61526e-05	2.61536e-05	2.61603e-05	2.61536e-05	2.61521e-05	2.61539e-05	2.61515e-05	2.61569e-05	2.61537e-05	2.61572e-05	2.61438e-05	2.61496e-05	2.6154e-05	2.61492e-05	2.61463e-05	2.61504e-05	2.61457e-05	2.61401e-05	2.61458e-05	2.61481e-05	2.61452e-05	2.61464e-05	2.61558e-05	2.61561e-05	2.61563e-05	2.61556e-05	2.61521e-05	2.61487e-05	2.61545e-05	2.61547e-05	2.61522e-05	2.61539e-05
Trial(gray) 23	2.6149e-05	2.61474e-05	2.61582e-05	2.61428e-05	2.61466e-05	2.6144e-05	2.61433e-05	2.61441e-05	2.61569e-05	2.61473e-05	2.61545e-05	2.61404e-05	2.61503e-05	2.61553e-05	2.61616e-05	2.61463e-05	2.61546e-05	2.61515e-05	2.61546e-05	2.61547e-05	2.61528e-05	2.61539e-05	2.61656e-05	2.61597e-05	2.61591e-05	2.61594e-05	2.61655e-05	2.61531e-05	2.61607e-05	2.6158e-05	2.61578e-05	2.61647e-05	2.61625e-05	2.61594e-05	2.61645e-05	2.61613e-05	2.61635e-05	2.61704e-05	2.61702e-05	2.61624e-05	2.61738e-05	2.61628e-05	2.61688e-05	2.61606e-05	2.61568e-05	2.61601e-05	2.61671e-05	2.61601e-05	2.61598e-05
Trial(gray) 24	2.6136e-05	2.61315e-05	2.61315e-05	2.61294e-05	2.61322e-05	2.61351e-05	2.61331e-05	2.61293e-05	2.61359e-05	2.61295e-05	2.61219e-05	2.61195e-05	2.61312e-05	2.61404e-05	2.61402e-05	2.61425e-05	2.61413e-05	2.6139e-05	2.61336e-05	2.61461e-05	2.61452e-05	2.61414e-05	2.61413e-05	2.61335e-05	2.61418e-05	2.6138e-05	2.61389e-05	2.61377e-05	2.61368e-05	2.61372e-05	2.61446e-05	2.61386e-05	2.61453e-05	2.61488e-05	2.61404e-05	2.6146e-05	2.61438e-05	2.61448e-05	2.61507e-05	2.61463e-05	2.61498e-05	2.61443e-05	2.6141e-05	2.61497e-05	2.61503e-05	2.61439e-05	2.61424e-05	2.61407e-05	2.61407e-05
Trial(gray) 25	2.61803e-05	2.61748e-05	2.61772e-05	2.61814e-05	2.61716e-05	2.61736e-05	2.61773e-05	2.61712e-05	2.61791e-05	2.61772e-05	2.61794e-05	2.61897e-05	2.61802e-05	2.61803e-05	2.61871e-05	2.61777e-05	2.61817e-05	2.61754e-05	2.61714e-05	2.61725e-05	2.61735e-05	2.61756e-05	2.61757e-05	2.61795e-05	2.61827e-05	2.61782e-05	2.61809e-05	2.61805e-05	2.61878e-05	2.61853e-05	2.6183e-05	2.61753e-05	2.61781e-05	2.61861e-05	2.61781e-05	2.61807e-05	2.61698e-05	2.61755e-05	2.61842e-05	2.61786e-05	2.61802e-05	2.61768e-05	2.61796e-05	2.61832e-05	2.61785e-05	2.61839e-05	2.61861e-05	2.61877e-05	2.61927e-05
Trial(gray) 26	2.61641e-05	2.61596e-05	2.61625e-05	2.61637e-05	2.61631e-05	2.61575e-05	2.61562e-05	2.61618e-05	2.61644e-05	2.61617e-05	2.61599e-05	2.61654e-05	2.61639e-05	2.61673e-05	2.61747e-05	2.61694e-05	2.61689e-05	2.61712e-05	2.61619e-05	2.61609e-05	2.61613e-05	2.61625e-05	2.61638e-05	2.6159e-05	2.61595e-05	2.61596e-05	2.61613e-05	2.61527e-05	2.61662e-05	2.61732e-05	2.61716e-05	2.61629e-05	2.61673e-05	2.6164e-05	2.61624e-05	2.61638e-05	2.61668e-05	2.6167e-05	2.61642e-05	2.61667e-05	2.61695e-05	2.61663e-05	2.61663e-05	2.61555e-05	2.61718e-05	2.61693e-05	2.61719e-05	2.61747e-05	2.61728e-05
Trial(gray) 27	2.61645e-05	2.61622e-05	2.61624e-05	2.61587e-05	2.61662e-05	2.61615e-05	2.61624e-05	2.61651e-05	2.61693e-05	2.615e-05	2.61561e-05	2.61526e-05	2.6157e-05	2.61558e-05	2.61622e-05	2.61671e-05	2.61556e-05	2.61447e-05	2.61489e-05	2.61597e-05	2.61558e-05	2.61599e-05	2.61601e-05	2.61561e-05	2.61558e-05	2.61552e-05	2.61567e-05	2.61525e-05	2.61538e-05	2.61652e-05	2.61728e-05	2.61669e-05	2.61672e-05	2.61619e-05	2.61645e-05	2.61507e-05	2.6161e-05	2.61491e-05	2.61642e-05	2.61638e-05	2.61523e-05	2.61638e-05	2.61664e-05	2.61674e-05	2.61726e-05	2.61592e-05	2.61563e-05	2.6158e-05	2.61592e-05
Trial(gray) 28	2.61484e-05	2.61524e-05	2.61509e-05	2.61559e-05	2.61516e-05	2.61574e-05	2.61526e-05	2.61536e-05	2.61461e-05	2.61502e-05	2.61449e-05	2.61511e-05	2.61479e-05	2.61574e-05	2.61565e-05	2.61518e-05	2.61603e-05	2.6161e-05	2.61629e-05	2.61572e-05	2.61507e-05	2.61521e-05	2.6159e-05	2.61534e-05	2.61461e-05	2.61493e-05	2.6158e-05	2.61521e-05	2.61621e-05	2.61605e-05	2.61487e-05	2.61586e-05	2.61574e-05	2.61578e-05	2.61533e-05	2.61551e-05	2.61509e-05	2.61593e-05	2.61561e-05	2.61499e-05	2.61501e-05	2.61557e-05	2.61555e-05	2.61613e-05	2.61611e-05	2.6152e-05	2.61405e-05	2.61459e-05	2.61383e-05
[truncated: 352 more columns]

## Sheet: Fig. 4d
Condition	VTA (in), NAc (in)	VTA (out), NAc (in)	VTA (in), NAc (out)
Average	2.06203e-07	3.78492e-08	4.15306e-08
S.E.M.	3.94131e-08	7.16878e-09	2.02233e-08
Trial1	1.41396e-07	2.79253e-08	1.02303e-08
Trial2	1.99746e-07	5.17728e-08	3.49959e-08
Trial3	2.77468e-07	3.38495e-08	7.93655e-08

## Sheet: Fig. 4e
Condition	30 Hz	50 Hz	100 Hz
Average	1.52438e-07	2.00825e-07	1.64465e-07
S.E.M.	5.75951e-08	4.39418e-08	3.16612e-08
Trial1	4.88574e-08	1.25261e-07	1.03048e-07
Trial2	1.60585e-07	1.99746e-07	1.81825e-07
Trial3	2.47873e-07	2.77468e-07	2.08523e-07

## Sheet: Fig. 4f
Condition	Ch1	Ch2
Average	2.39363e-07	5.02636e-08
S.E.M.	2.89505e-08	3.48865e-08
Trial1	1.25261e-07	3.34682e-08
Trial2	3.45619e-07	1.1731e-07
Trial3	2.00123e-07	1.28597e-11
Trial4	3.54404e-07
Trial5	1.69928e-07
Trial6	2.42353e-07
Trial7	1.99746e-07
Trial8	2.77468e-07
