# Supplementary material for: Organic electrochemical transistor arrays for real-time mapping of evoked neurotransmitter release in vivo
Source: eLife. 2020 Feb 11;9:e50345. doi: 10.7554/eLife.50345 (PMC7075691; doi:10.7554/eLife.50345)
Supplement: Figure 5—source data 1. [file elife-50345-fig5-data1.xlsx]

## Sheet: Fig. 5c
Condition	NAc			Lower CPu			Upper CPu
	VTA-Stim	SNc-Stim	Ctrl	VTA-Stim	SNc-Stim	Ctrl	VTA-Stim	SNc-Stim	Ctrl
Average	1.3283e-07	6.846e-08	2.00018e-08	5.85029e-08	8.16025e-08	1.33824e-08	1.03399e-07	1.2366e-07	2.20941e-08
S.E.M.	9.6625e-09	1.15268e-08	5.92895e-09	8.67679e-09	1.90745e-08	4.47173e-09	1.81355e-08	3.28005e-08	5.06243e-09
Trial1	1.03843e-07	2.27694e-08	1.81656e-08	6.39063e-08	1.35274e-07	2.6482e-08	1.00538e-07	8.68692e-08	3.39334e-08
Trial2	9.82514e-08	6.49473e-08	6.81381e-08	9.72049e-08	9.35887e-08	2.98709e-08	1.83024e-07	3.83485e-07	3.20906e-08
Trial3	1.2131e-07	9.73655e-08	2.67103e-09	6.63681e-08	8.74099e-08	5.14264e-09	9.70629e-08	9.92053e-08	5.22094e-08
Trial4	1.65531e-07	5.8126e-08	1.53472e-08	9.12093e-08	6.97275e-08	1.72362e-08	2.06263e-07	2.22104e-07	3.56469e-08
Trial5	1.47268e-07	9.22981e-08	9.77876e-10	1.0165e-07	2.20928e-07	2.50764e-08	1.841e-07	2.08753e-07	3.66052e-08
Trial6	1.20792e-07	4.06571e-08	2.09664e-08	5.7754e-08	8.22733e-08	7.5283e-10	6.38312e-08	1.25658e-07	7.51841e-09
Trial7	1.78382e-07	1.03056e-07	1.29187e-08	4.22992e-08	2.41725e-08	2.45243e-09	5.95549e-08	8.20906e-08	1.76742e-09
Trial8	1.52853e-07		1.24196e-08	4.65482e-08	4.23049e-08	4.59157e-11	8.95002e-08	5.00135e-08	9.38868e-09
Trial9	1.0724e-07		2.69783e-08	3.32821e-08	3.11378e-08		6.45391e-08	2.43059e-08	8.34805e-09
Trial10			2.14358e-08	2.29914e-08	2.92086e-08		2.76898e-08	2.22543e-08	4.7731e-09
Trial11				2.03183e-08			6.12865e-08	5.55221e-08	2.07534e-08
