# Supplementary material for: Organic electrochemical transistor arrays for real-time mapping of evoked neurotransmitter release in vivo
Source: eLife. 2020 Feb 11;9:e50345. doi: 10.7554/eLife.50345 (PMC7075691; doi:10.7554/eLife.50345)
Supplement: Figure 6—source data 1. [file elife-50345-fig6-data1.xlsx]

## Sheet: Fig. 6c
Condition	VTA (-)	VTA (+)	SNc (-)	SNc (+)
Average	1.3283e-07	8.62813e-08	6.846e-08	2.90131e-08
S.E.M.	9.6625e-09	1.88742e-08	1.15268e-08	7.74262e-09
Trial1	1.03843e-07	5.44792e-08	2.27694e-08	1.68427e-08
Trial2	9.82514e-08	3.76759e-08	6.49473e-08	1.85679e-08
Trial3	1.2131e-07	1.22288e-07	9.73655e-08	5.04803e-08
Trial4	1.65531e-07	1.0439e-07	5.8126e-08	3.01613e-08
Trial5	1.47268e-07	1.51115e-07	9.22981e-08
Trial6	1.20792e-07	4.77405e-08	4.06571e-08
Trial7	1.78382e-07		1.03056e-07
Trial8	1.52853e-07
Trial9	1.0724e-07

## Sheet: Fig. 6d
Condition	VTA (-)	VTA (+)	SNc (-)	SNc (+)
Average	5.85029e-08	2.36361e-08	8.16025e-08	2.23789e-08
S.E.M.	8.67679e-09	7.14436e-09	1.90745e-08	4.94118e-09
Trial1	6.39063e-08	2.75662e-08	1.35274e-07	1.83056e-08
Trial2	9.72049e-08	1.24923e-08	9.35887e-08	3.41647e-08
Trial3	6.63681e-08	5.54166e-08	8.74099e-08	1.03131e-08
Trial4	9.12093e-08	2.33749e-08	6.97275e-08	1.51283e-08
Trial5	1.0165e-07	4.91906e-09	2.20928e-07	3.39829e-08
Trial6	5.7754e-08	1.80477e-08	8.22733e-08
Trial7	4.22992e-08		2.41725e-08
Trial8	4.65482e-08		4.23049e-08
Trial9	3.32821e-08		3.11378e-08
Trial10	2.29914e-08		2.92086e-08
Trial11	2.03183e-08

## Sheet: Fig. 6e
Condition	VTA (-)	VTA (+)	SNc (-)	SNc (+)
Average	1.03399e-07	7.522e-08	1.2366e-07	9.03229e-08
S.E.M.	1.81355e-08	7.29379e-09	3.28005e-08	1.72395e-08
Trial1	1.00538e-07	6.64536e-08	8.68692e-08	8.26537e-08
Trial2	1.83024e-07	8.2196e-08	3.83485e-07	1.05326e-07
Trial3	9.70629e-08	1.08443e-07	9.92053e-08	1.66187e-07
Trial4	2.06263e-07	6.97279e-08	2.22104e-07	4.83704e-08
Trial5	1.841e-07	6.25001e-08	2.08753e-07	5.81674e-08
Trial6	6.38312e-08	6.19999e-08	1.25658e-07	8.12325e-08
Trial7	5.95549e-08		8.20906e-08
Trial8	8.95002e-08		5.00135e-08
Trial9	6.45391e-08		2.43059e-08
Trial10	2.76898e-08		2.22543e-08
Trial11	6.12865e-08		5.55221e-08
